# Supplementary material
Source: Copernicus journal article supplement (doi:10.5194/bg-23-3723-2026)
Supplement: Supplementary file 1 [file bg-23-3723-2026-supplement.pdf]

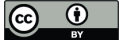

*Supplement of*

## **Temperature dependence of the contribution of soil water content to soil respiration in a monsoon influenced temperate deciduous forest**

**Dongmin Seo et al.**

*Correspondence to:* Jaeseok Lee ([jaeseok@konkuk.ac.kr](mailto:jaeseok@konkuk.ac.kr))

The copyright of individual parts of the supplement might differ from the article licence.

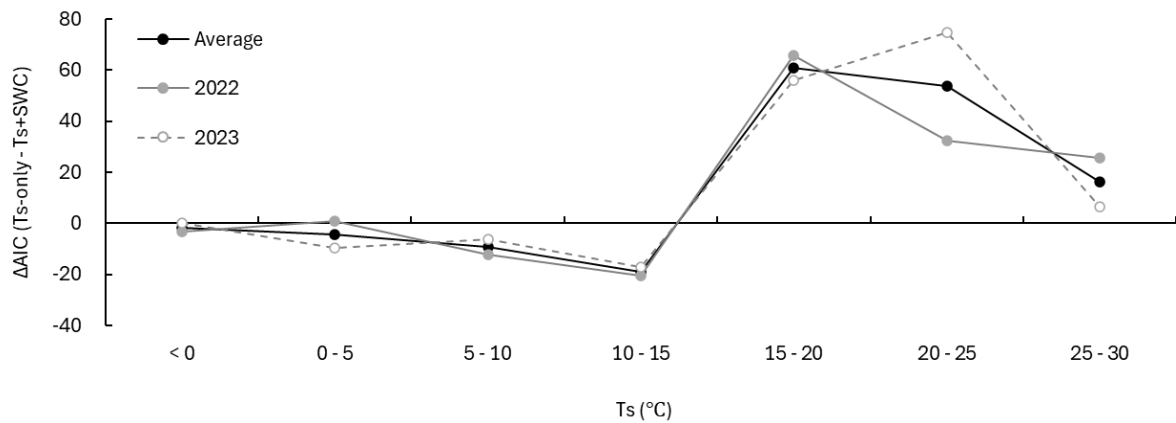

**Figure S1:** SMC related model fit improvement ( $\Delta AIC$ ) by Ts bin. The effect of including SMC was quantified as the difference in AIC between the Ts-only model and the Ts + SMC model ( $\Delta AIC$ ). Positive  $\Delta AIC$  values indicate improved model fit when SMC is included. The gray solid line indicates 2022, the gray dashed line indicates 2023, and the black solid line indicates the mean across both years.

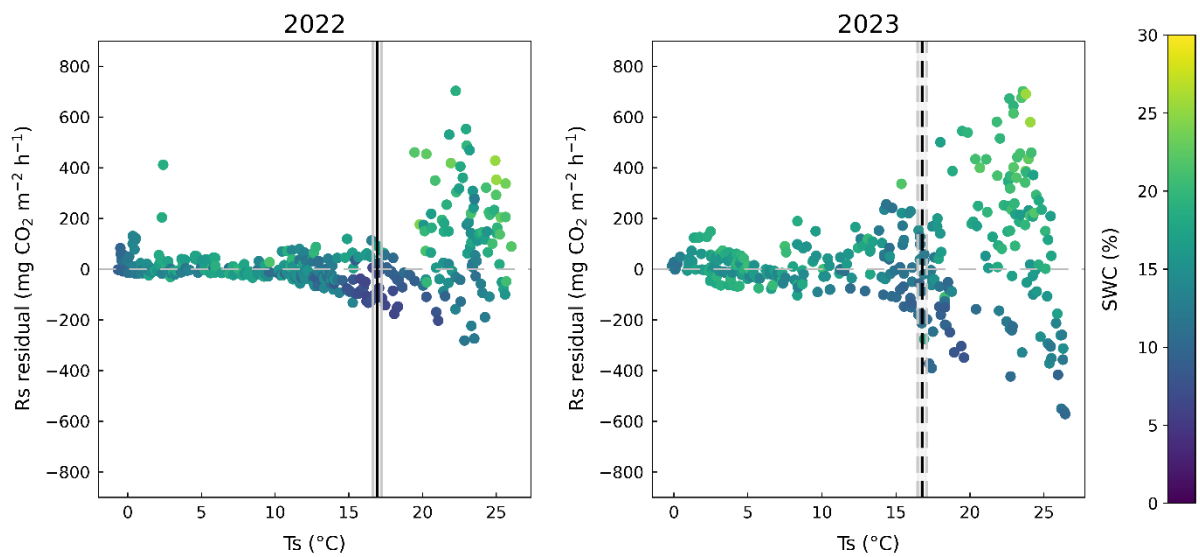

**Figure S2:** Relationship between Ts and residuals of Rs in 2022 and 2023. Residuals were calculated as observed Rs minus Rs predicted by the Ts only model. Points are colored by SWC. Vertical lines indicate the estimated breakpoint in the Rs response to Ts for each year, and the horizontal line indicates zero residual.

**Table S1:** Model comparison using AIC to determine the optimal number of temperature breakpoints in the relationship between Rs and Ts and to evaluate goodness of fit across candidate models.

| Year | Model                               | Breakpoint | k | AIC     |
|------|-------------------------------------|------------|---|---------|
| 2022 | Exponential                         | 0          | 2 | 3469.96 |
|      | segmented regression(1 breakpoints) | 1          | 4 | 3449.61 |
|      | segmented regression(2 breakpoints) | 2          | 6 | 3457.95 |
| 2023 | Exponential                         | 0          | 2 | 3562.32 |
|      | segmented regression(1 breakpoints) | 1          | 4 | 3449.92 |
|      | segmented regression(2 breakpoints) | 2          | 6 | 3512.06 |

**Table S2:** Segment specific regression statistics for the relationship between soil temperature and soil respiration below and above the breakpoint in 2022 and 2023. Ts range, slope of the Ts–Rs fit, R<sup>2</sup>, p-value, and mean SWC are shown for each segment.

| <b>Year</b> | <b>Section</b>   | <b>Ts range</b> | <b>Slope of Ts–Rs fit</b> | <b>R<sup>2</sup></b> | <b>p-value</b> | <b>Mean SWC (%)</b> |
|-------------|------------------|-----------------|---------------------------|----------------------|----------------|---------------------|
| 2022        | Below breakpoint | Ts < 16.94      | 10.88                     | 0.65                 | < 0.0001       | 13.58               |
| 2023        | Below breakpoint | Ts < 16.77      | 30.27                     | 0.77                 | < 0.0001       | 15.27               |
| 2022        | Above breakpoint | Ts ≥ 16.94      | 127.91                    | 0.66                 | < 0.0001       | 15.22               |
| 2023        | Above breakpoint | Ts ≥ 16.77      | 190.00                    | 0.68                 | < 0.0001       | 16.18               |
